# Supplementary material for: Influence of total sugar intake on metabolic blood markers at 8 years of age in the Childhood Obesity Project
Source: PubMed Central journal article supplement (PMC7867537; doi:10.1007/s00394-020-02229-w), 2020-05-06
Supplement: 394_2020_2229_MOESM1_ESM.pdf [file 394_2020_2229_MOESM1_ESM.pdf]

Supplementary Table 1: Baseline characteristics for study-participants with nutritional information and blood measurements at 8 years of age per country and gender

| Characteristics <sup>1</sup>          | Country           |                   |                 |                  |                  | Gender          |                   |
|---------------------------------------|-------------------|-------------------|-----------------|------------------|------------------|-----------------|-------------------|
|                                       | Germany<br>(N=24) | Belgium<br>(N=35) | Italy<br>(N=86) | Poland<br>(N=71) | Spain<br>(N=109) | Male<br>(N=160) | Female<br>(N=165) |
| <b>BMI</b>                            | 16 (2)            | 16 (2)            | 18 (3)          | 17 (3)           | 17 (3)           | 17 (3)          | 17 (3)            |
| Total energy intake (kcal)            | 1642 (329)        | 1410 (263)        | 1511 (260)      | 1648 (168)       | 1650 (307)       | 1653 (277)      | 1522 (265)        |
| Total sugar intake (kcal)             | 398 (167)         | 332 (119)         | 277 (91)        | 381 (93)         | 328 (93)         | 343 (117)       | 321 (102)         |
| Energy percentage from total sugar    | 24 (7)            | 23 (6)            | 18 (5)          | 23 (5)           | 20 (5)           | 21 (6)          | 21 (6)            |
| <b>Total sugar intake<sup>2</sup></b> |                   |                   |                 |                  |                  |                 |                   |
| Milk products (kcal)                  | 58 (27)           | 36 (29)           | 33 (22)         | 61 (36)          | 90 (41)          | 65 (42)         | 62 (41)           |
| Fruit products (kcal)                 | 148 (95)          | 75 (62)           | 85 (47)         | 120 (63)         | 81 (50)          | 104 (68)        | 90 (56)           |
| Sweetened beverages (kcal)            | 42 (28)           | 104 (136)         | 49 (41)         | 50 (43)          | 61 (60)          | 54 (49)         | 54 (57)           |
| Bread and cereals (kcal)              | 32 (35)           | 15 (14)           | 9 (12)          | 24 (26)          | 16 (15)          | 19 (25)         | 17 (17)           |
| Confectionary (kcal)                  | 108 (54)          | 104 (62)          | 61 (37)         | 105 (62)         | 73 (47)          | 86 (61)         | 82 (46)           |
| <b>Blood marker<sup>3</sup></b>       |                   |                   |                 |                  |                  |                 |                   |
| Glucose [mg/dl]                       | 87.5 (12.1)       | 86.3 (5.4)        | 78.3 (8.4)      | 88.5 (5.9)       | 81.9 (6.8)       | 84.6 (8.3)      | 82.1 (8.3)        |
| Insulin [ $\mu$ IU/ml]                | 14.6 (17.2)       | 8.4 (2.2)         | 7.3 (3.0)       | 9.1 (3.0)        | 10.0 (3.4)       | 9.4 (7.4)       | 9.1 (3.4)         |
| HOMA index                            | 3.6 (5.7)         | 1.8 (0.6)         | 1.4 (0.6)       | 2.0 (0.7)        | 2.0 (0.8)        | 1.8 (0.7)       | 1.9 (0.8)         |
| TG [mg/dl]                            | 129.6 (96.8)      | 60.3 (27.1)       | 59.8 (22.2)     | 73.2 (31.9)      | 49.4 (18.1)      | 64.3 (47.6)     | 64.7 (31.5)       |
| HDL-C [mg/dl]                         | 57.7 (12.1)       | 63.6 (16.9)       | 61.2 (16.0)     | 50.4 (11.5)      | 63.5 (14.1)      | 61.2 (16.1)     | 58.1 (13.9)       |
| TG/HDL-C ratio                        | 2.6 (2.4)         | 1.1 (0.8)         | 1.1 (0.6)       | 1.6 (0.9)        | 0.8 (0.4)        | 1.0 (0.6)       | 1.2 (0.8)         |
| TC [mg/dl]                            | 170.4 (24.1)      | 167.8 (22.4)      | 165.2 (30.7)    | 167.6 (30.5)     | 168.5 (25.3)     | 166.4 (27.3)    | 168.5 (27.8)      |
| LDL-C [mg/dl]                         | 90.4 (26.4)       | 92.7 (23.1)       | 89.0 (24.7)     | 102.9 (26.9)     | 95.3 (23.0)      | 91.6 (24.8)     | 97.7 (24.9)       |

<sup>1</sup>Categorical variables are displayed as N (%) and continuous as mean (SD).

<sup>2</sup> Some food groups were not consumed by all children: milk products (n= 38), fruit products (n= 49), sweetened beverages (n= 197), bread and cereals (n= 36), confectionary (n= 40).

<sup>3</sup> Missings: Insulin (11), HOMA index (35), Triglycerides (1), HDL-C (1), TG/HDL-C ratio (1), LDL-C (4).

Abbreviations: High homeostasis model assessment (HOMA), Triglycerides (TG), High density lipoprotein cholesterol (HDL-C), Total cholesterol (TC), Low density lipoprotein cholesterol (LDL-C)
