# Supplementary material for: Influence of total sugar intake on metabolic blood markers at 8 years of age in the Childhood Obesity Project
Source: PubMed Central journal article supplement (PMC7867537; doi:10.1007/s00394-020-02229-w), 2020-05-06
Supplement: 394_2020_2229_MOESM2_ESM.pdf [file 394_2020_2229_MOESM2_ESM.pdf]

Supplementary Table 2: Linear regression coefficients for total sugar intake (per 100kcal) and their association with markers of sugar metabolism and lipids in an unadjusted model and using crude blood marker values.

|                         | Unadjusted model <sup>1</sup>    |                  |         | Crude values <sup>2</sup>            |                  |         |
|-------------------------|----------------------------------|------------------|---------|--------------------------------------|------------------|---------|
|                         | $\beta$ -coefficient of z- score | 95% CI           | P-value | $\beta$ -coefficient of crude values | 95% CI           | P-value |
| <b>Sugar metabolism</b> |                                  |                  |         |                                      |                  |         |
| Glucose                 | 0.03                             | (-0.10–0.15)     | 0.679   | 0.39                                 | (-0.60–1.38)     | 0.438   |
| Insulin                 | -0.25                            | (-0.13–0.08)     | 0.650   | 0.47                                 | (-0.26–1.21)     | 0.207   |
| HOMA-Index              | -0.05                            | (-0.18–0.07)     | 0.389   | 0.02                                 | (-0.07–0.11)     | 0.675   |
| <b>Blood lipids</b>     |                                  |                  |         |                                      |                  |         |
| TG                      | 0.07                             | (-0.03–0.17)     | 0.172   | 1.82                                 | (-2.88–6.52)     | 0.447   |
| HDL-C*                  | -0.12                            | (-0.24– (-0.00)) | 0.049   | -2.47                                | (-4.32– (-0.61)) | 0.009   |
| TG/HDL-C-ratio          | 0.01                             | (-0.10–0.12)     | 0.852   | 0.09                                 | (-0.00–0.19)     | 0.054   |
| TC                      | -0.08                            | (-0.20–0.05)     | 0.219   | -2.87                                | (-6.58–0.83)     | 0.128   |
| LDL-C                   | -0.03                            | (-0.15–0.10)     | 0.672   | -0.82                                | (-4.09–2.45)     | 0.622   |

Note: All values are  $\beta$ -coefficients (95% CIs) for an increase of 100kcal of total sugar;

<sup>1</sup>Separated unadjusted models of markers of sugar metabolism and lipids. Outcome variables were included in the analysis as z scores by laboratory.

<sup>2</sup>Separated models of markers of sugar metabolism and lipids were each adjusted for sex, country, zBMI, and misreporting. Outcome variables were included in the analysis as crude values.

\*=significant.

Abbreviations: Triglycerides (TG), High density lipoprotein cholesterol (HDL-C), Total cholesterol (TC), Low density lipoprotein cholesterol (LDL-C)
