# Supplementary material for: Influence of total sugar intake on metabolic blood markers at 8 years of age in the Childhood Obesity Project
Source: PubMed Central journal article supplement (PMC7867537; doi:10.1007/s00394-020-02229-w), 2020-05-06
Supplement: 394_2020_2229_MOESM3_ESM.pdf [file 394_2020_2229_MOESM3_ESM.pdf]

Supplementary Table 3: Unadjusted linear regression coefficients for sugar intake from major food groups and their association with z- score HDL-C levels<sup>1</sup>

| <b>Total sugar intake from</b> | <b><math>\beta</math>-coefficient of<br/>z- score</b> | <b>95% CI</b> | <b>P-value</b> |
|--------------------------------|-------------------------------------------------------|---------------|----------------|
| Milk products                  | 0.98                                                  | (-0.18–2.14)  | 0.098          |
| Fruit products                 | -0.51                                                 | (-1.26–0.25)  | 0.190          |
| Sweetened beverages            | -1.86                                                 | (-3.08–0.65)  | 0.003          |
| Bread and cereals              | -0.63                                                 | (-2.79–1.54)  | 0.570          |
| Confectionary                  | -0.17                                                 | (-1.05–0.71)  | 0.705          |

Note: All values are  $\beta$ -coefficients (95% CIs) for an increase of 100kcal of sugar from specific food groups;  
<sup>1</sup>HDL-C concentrations were included in the analysis after laboratory specific standardization.

Abbreviation: High density lipoprotein cholesterol (HDL-C)
